# Supplementary material
Source: publisher figshare collection journal article supplement (https://tandf.figshare.com/ndownloader/files/22295331)
Supplement: Supplementary file 1 [file 22295331]

Suppl. Table 1. Questionnaire items that were asked to be marked by uveitis experts with one of the following answers:

a) Always suggests Behçet disease uveitis (highly characteristic of Behçet disease uveitis)

b) Mostly suggests Behçet disease uveitis (fairly characteristic of Behçet disease uveitis)

c) Might suggest Behçet disease uveitis (compatible with a diagnosis of Behçet disease uveitis)

d) Never suggests Behçet disease uveitis (rules out the diagnosis of Behçet disease uveitis)

| **Ocular Symptoms** |
| --- |
| History of recurrent (self-limited) visual blurring |
| Eye redness |
| Decreased vision |
| Floaters |
| Sudden onset of symptomatic uveitis flare |
| **Ocular signs** |
| Bilateral involvement |
| Conjunctival ulcers |
| Disproportionately mild ciliary injection |
| Freely circulating anterior chamber cells ± endothelial dusting |
| Smooth layered shifting hypopyon |
| Chronic anterior uveitis with high-grade flare |
| Acute intraocular pressure rise at relapses (not associated with corticosteroid use or angle closure) |
| Granulomatous anterior uveitis |
| Diffuse vitritis |
| Snowballs/snowbanks |
| Inferior vitreous precipitates |
| Diffuse retinal periphlebitis (fluffy-white cuffing) |
| Diffuse gliotic sheathing of retinal veins |
| Nodular or segmental retinal periphlebitis |
| Branch retinal vein occlusion |
| Central retinal vein occlusion |
| Retinal arteriolar occlusion |
| Peripheral occlusive periphlebitis |
| Ghost retinal vessel(s) |
| Retinal hemorrhages |
| Transient superficial retinal infiltrate(s) |
| Full-thickness retinal infiltrate(s) |
| Diffuse retinal whitening |
| Diffuse retinal atrophy and gliosis |
| Active or inactive choroiditis |
| Papillitis |
| Optic disc hyperemia |
| Transient infiltrate on the optic disc |
| Optic atrophy |
| Cystoid macular edema |
| Neovascularization of the optic disc / Neovascularization elsewhere in the retina |
| Spontaneous relapsing and remitting nature of any inflammatory sign listed above |
| **Fluorescein angiographic findings** |
| Diffuse retinal capillary leakage |
| Retinal capillary nonperfusion |
| Optic disc hyperfluorescence/leakage |
